# Supplementary material
Source: PubMed Central journal article supplement (PMC4533883)
Supplement: NIHMS64576-supplement-FigS1.pdf [file NIHMS64576-supplement-FigS1.pdf]

## Supplementary Figure 1. Protein sequence alignment of G6PC3 in different species

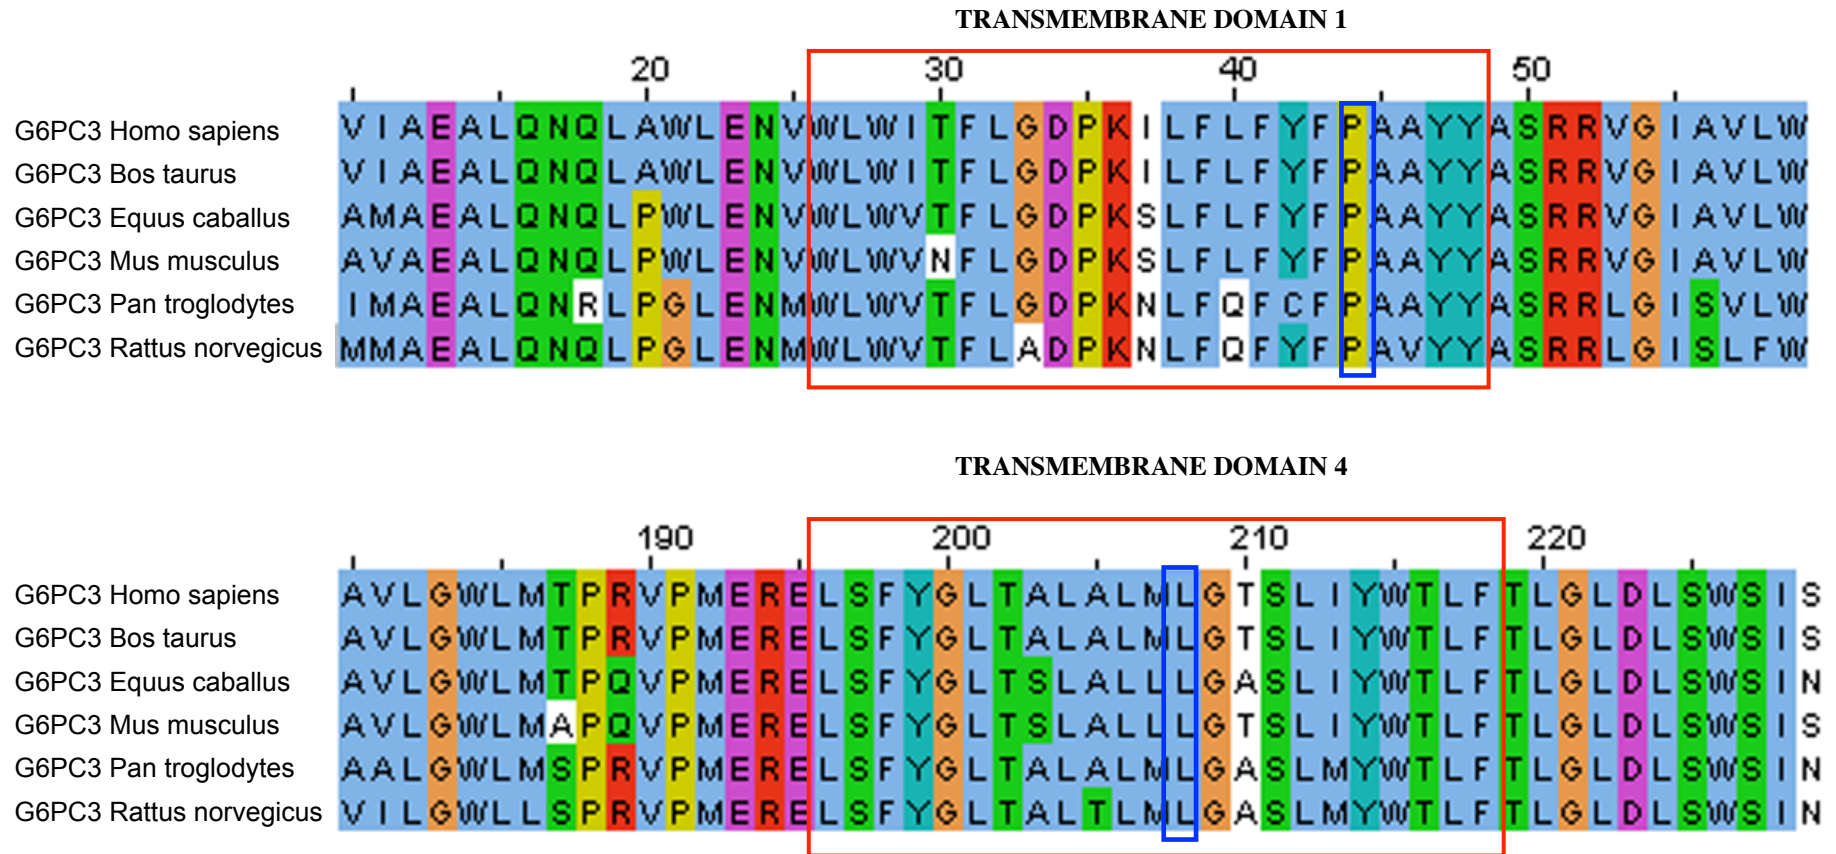

G6PC3 amino acid residue homology between species with transmembrane domains 1 (residues 26-48) and 4 (residues 196-218) boxed in red. The positions of the p.Pro44Ser and p.Leu208Arg mutations are outlined in blue. Amino acid residues are 69% (16/23) and 79% (18/23) fully conserved between species in transmembrane domains 1 and 4 respectively. The proteins used for individual amino acid residue comparison and their corresponding RefSeq numbers include: Homo sapiens (NP\_001073535), Bos taurus (NP\_899208.2), Equus caballus (XP\_001490866.1), Mus musculus (NM\_175935.3), Pan troglodytes (XM\_511541.2), Rattus norvegicus (NM\_176077.3). The ClustalW method was used for sequence alignment.
